# Supplementary material for: Morphological variation under domestication: how variable are chickens?
Source: R Soc Open Sci. 2018 Aug 8;5(8):180993. doi: 10.1098/rsos.180993 (PMC6124038; doi:10.1098/rsos.180993)
Supplement: R script 3. R code used to conduct modularity and integration analyses. [file rsos180993supp5.r]

#R version 3.3.3 (2017-03-06) -- "Another Canoe"
#geomorph version 3.0.4

install.packages("geomorph")
install.packages("shapes")
library("geomorph")
library("shapes")

# input contains symmertric component, CS and log CS exported from MorphoJ, because geomorph::bilat.symmetry for GPA does not compute centroid sizes. however, CS can be computed from gpagen function in geomorph. CS values are identical
# first columns consist of identifiers as ID, breed, type (chicken/fowl), centroid size and log CS, and Use as defined by Storey, AND grouping factors for Procrustes ANOVAs
data=read.table("Output_CS_symmComp_from_MorphoJ.txt",header=T,sep="\t", stringsAsFactors=FALSE, row.names = 1)
coords<- arrayspecs(data[7:78], 24, 3)


# Question1: are shape changes correlated with changes in size
gdf <- geomorph.data.frame(shape = coords, cs = data$Centroid.Size , type=data$type, breed=data$breed, groupFig2= data$group_Fig2)

#all data
ChickenAllometry <- procD.allometry(shape~cs, logsz = TRUE, data=gdf, iter=999, print.progress = FALSE)
summary(ChickenAllometry)
        #Type I (Sequential) Sums of Squares and Cross-products
        #Randomized Residual Permutation Procedure Used
        #1000 Permutations
        #           Df      SS       MS     Rsq      F     Z  Pr(>F)  
        #log(size)  1 0.05311 0.053107 0.06651 4.2749 2.1856  0.021 * --> significant allometry
        #Residuals 60 0.74537 0.012423                               
        #Total     61 0.79848 

        #Figure 2
plot(ChickenAllometry, method = "RegScore", label=data$Storeys_grouping_Use)
        # type plot.procD.allometry to understand plotting parameters 
        # --> answer: shape is predicted by size

# test allometries between chicken and fowls
procD.lm(shape ~ log(cs)*type, RRPP=T, data=gdf)

        #              Df SS     MS       Rsq      F       Z        Pr(>F)   
        #log(cs)       1 0.05311 0.053107 0.066510 4.4261  2.22637  0.019 * #--> significant, shape depends on size
        #type          1 0.05023 0.050225 0.062902 4.2244  2.39954  0.013 * #--> significant, wild and dom differ in mean shape
        #log(cs):type  1 0.00557 0.005566 0.006971 0.4682 -0.51284  0.657   #--> interaction term is not significant, dom and wild do not differ in their allometries
        #Residuals    58 0.69592 0.011999                                 
        #Total        61 0.79848                                           
        #---
        #  Signif. codes:  0 '***' 0.001 '**' 0.01 '*' 0.05 '.' 0.1 ' ' 1

# test for allometric relationship for each sub group
gdf <- geomorph.data.frame(shape = coords, cs = data$Centroid.Size , type=data$type, breed=data$breed)

#wild
fowl.shape=gdf$shape[,,which(gdf$type=="fowl")]
fowl.cs=gdf$cs[which(gdf$type=="fowl")]
fowl <- geomorph.data.frame(shape = fowl.shape, cs = fowl.cs)

ChickenAllometry.fowl <- procD.allometry(shape~cs, logsz = TRUE, data=fowl, iter=999, print.progress = FALSE)
summary(ChickenAllometry.fowl)

        #            Df SS        MS       Rsq      F     Z        Pr(>F)
        # log(size)  1 0.005640 0.0056395 0.067558 1.3766 0.8502  0.228
        # Residuals 19 0.077838 0.0040967                              
        # Total     20 0.083477                                        
        --> no size-shape relation among wild fowls

#domesticated
dom.shape=gdf$shape[,,which(gdf$type=="chicken")]
dom.cs=gdf$cs[which(gdf$type=="chicken")]
dom <- geomorph.data.frame(shape = dom.shape, cs = dom.cs)

ChickenAllometry.dom <- procD.allometry(shape~cs, logsz = TRUE, data=dom, iter=499, print.progress = FALSE)
summary(ChickenAllometry.dom)
        #           Df      SS      MS      Rsq      F       Z  Pr(>F)
        #log(size)  1 0.01638 0.016380 0.026079 1.0443 0.46253  0.336
        #Residuals 39 0.61174 0.015686                               
        #Total     40 0.62812
        --> we do not find co-variation of shape and size in the chickens, which could be caused be the bifurcation of shape-size regression into groups i and iii see, Figure 2

# based on the previous results (two cohorts in chicken) we test whether Fig2 group iii (all other breeds) and i (folws and bantams) share a common allometry
data.i.iii=data[!data$group_Fig2 %in% c("ii"),]
coords<- arrayspecs(data.i.iii[7:78], 24, 3)
gdf.i.iii <- geomorph.data.frame(shape = coords, cs = data.i.iii$Centroid.Size , groupFig2= data.i.iii$group_Fig2)
procD.lm(shape ~ log(cs)*groupFig2, RRPP=T, data=gdf) 

        #                  Df       SS        MS      Rsq      F      Z  Pr(>F)   
        #log(cs)            1 0.022548 0.0225485 0.111400 5.4570 3.9655  0.001 **
        #groupFig2          1 0.005856 0.0058557 0.028930 1.4172 1.2062  0.117   --> i and iii do not differ in their mean shapes
        #log(cs):groupFig2  1 0.004593 0.0045928 0.022691 1.1115 0.7807  0.228   --> i and iii do not differ in their allometries
        #Residuals         41 0.169413 0.0041320                                 
        #Total             44 0.202410                                           

# Now, do the Siwss breeds (ii) differ in allometries from fowls, bantams, and other breeds combined (i+iii)
data=read.table("Output_CS_symmComp_from_MorphoJ_v2.txt",header=T,sep="\t", stringsAsFactors=FALSE, row.names = 1)
coords<- arrayspecs(data[8:79], 24, 3)
gdf <- geomorph.data.frame(shape = coords, cs = data$Centroid.Size, grouptest2= as.factor(data$group_Fig2_test2))
procD.lm(shape ~ log(cs)*grouptest2, RRPP=T, data=gdf) 

        #                   Df      SS      MS     Rsq       F      Z  Pr(>F)   
        #log(cs)             1 0.05311 0.05311 0.06651  8.1495 3.0053  0.002 **   --> significant, shape depends on size
        #grouptest2          1 0.35059 0.35059 0.43907 53.7991 5.5754  0.001 **   --> i_iii and ii differ in their mean shapes
        #log(cs):grouptest2  1 0.01682 0.01682 0.02107  2.5815 3.3037  0.001 **   --> i_iii and ii differ in their allometries
        #Residuals          58 0.37796 0.00652                                 
        #Total              61 0.79848                                         

#now test of homogeneity of slopes, plus pairwise slopes comparisons, as the interaction term is significant
#(this is from: https://www.researchgate.net/post/how_can_I_calculate_different_forms_of_allometry_by_software_tpsreg_v_138)
#this will tell us if one group undergo more shape change per unit centroid size than the other, or because they develop at the same rate but undergo different changes in shape (or both), do groups differ in the rate and/or direction of allometric shape change
# This will give you the pairwise comparisons, first for the slope "distance" (the rate of change in shape per unit change in the log(CS)  and the probability of a distance that large under the null; and the angle between the allometric vectors (in degrees) and the probability of an angle that large or larger under the null
type=gdf$grouptest2
HOS=advanced.procD.lm(shape~log(cs)+type, ~ log(cs)*type, groups= ~type, slope= ~log(cs), angle.type="deg", iter=999, data=gdf) #to determine whether the populations differ in the rate and/or direction of allometric shape change.
summary(HOS, formula = FALSE)
#intercept test (for common slopes)
HOS.int.test=advanced.procD.lm(shape~log(cs)+type, ~ log(cs), groups= ~type, slope= NULL, angle.type="deg", iter=999, data=gdf) #to determine whether the populations differ in the rate and/or direction of allometric shape change.
HOS.int.test$Z.means.dist
Plot.traj<-procD.allometry(shape~log(cs), f2=~type,logsz=F,iter=999,effect.type=c("F"),data=gdf)
plot(Plot.traj,method="PredLine")
